# Supplementary material
Source: PubMed Central journal article supplement (PMC5150400)

Dataset S1. Maximum likelihood phylogeny of odorant receptor genes in *Nasonia vitripennis*, *Apis mellifera*, and eight ant species. Groups consistent with being descendants of a single copy in the most recent common ancestor of ants and bees are indicated on the right. Node labels indicate bootstrap supports. Nvit = *Nasonia vitripennis*, Amel = *Apis mellifera*, Hsal = *Harpegnathos saltator*, Cbir = *Ooceraea biroi* (gene designations are maintained as “Cbir” to match the official annotation), Lhum = *Linepithema humile*, Cflo = *Camponotus floridanus*, Pbar = *Pogonomyrmex barbatus*, Sinv = *Solenopsis invicta*, Aech = *Acromyrmex echinator*, Acep = *Atta cephalotes*.

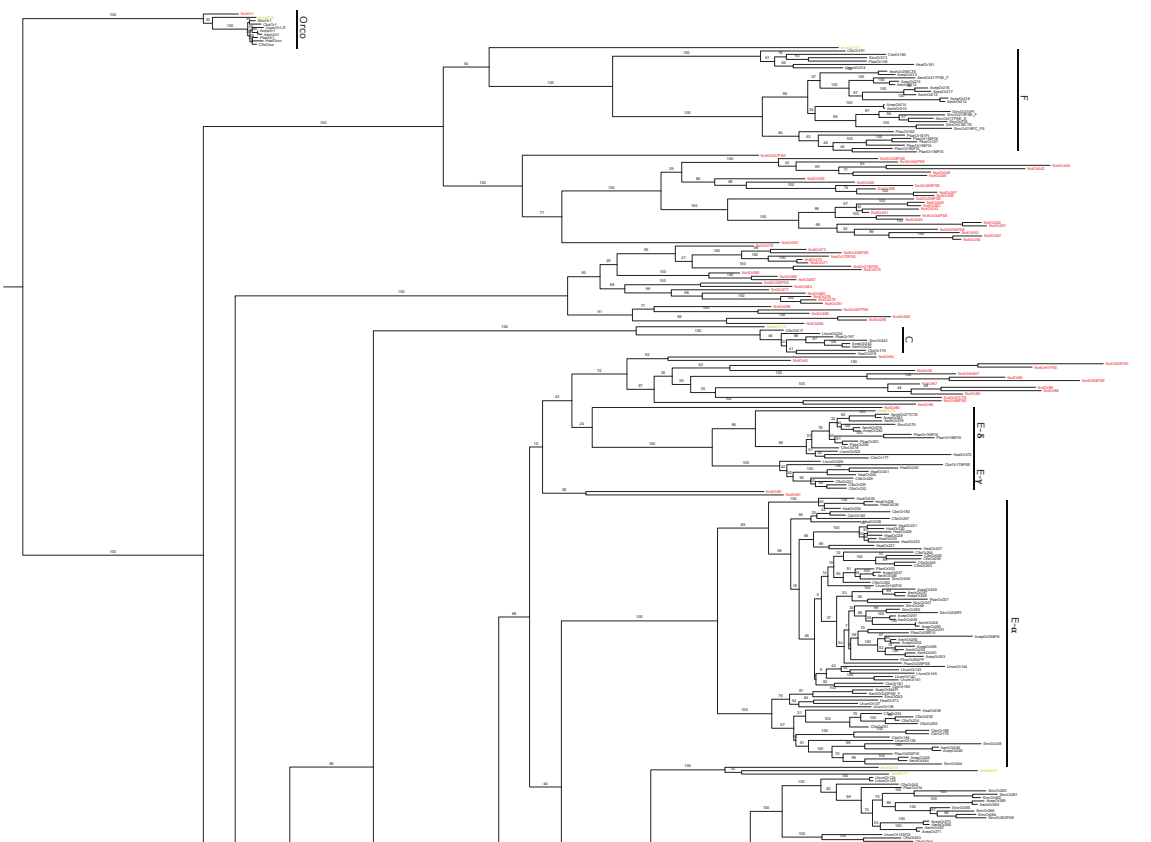

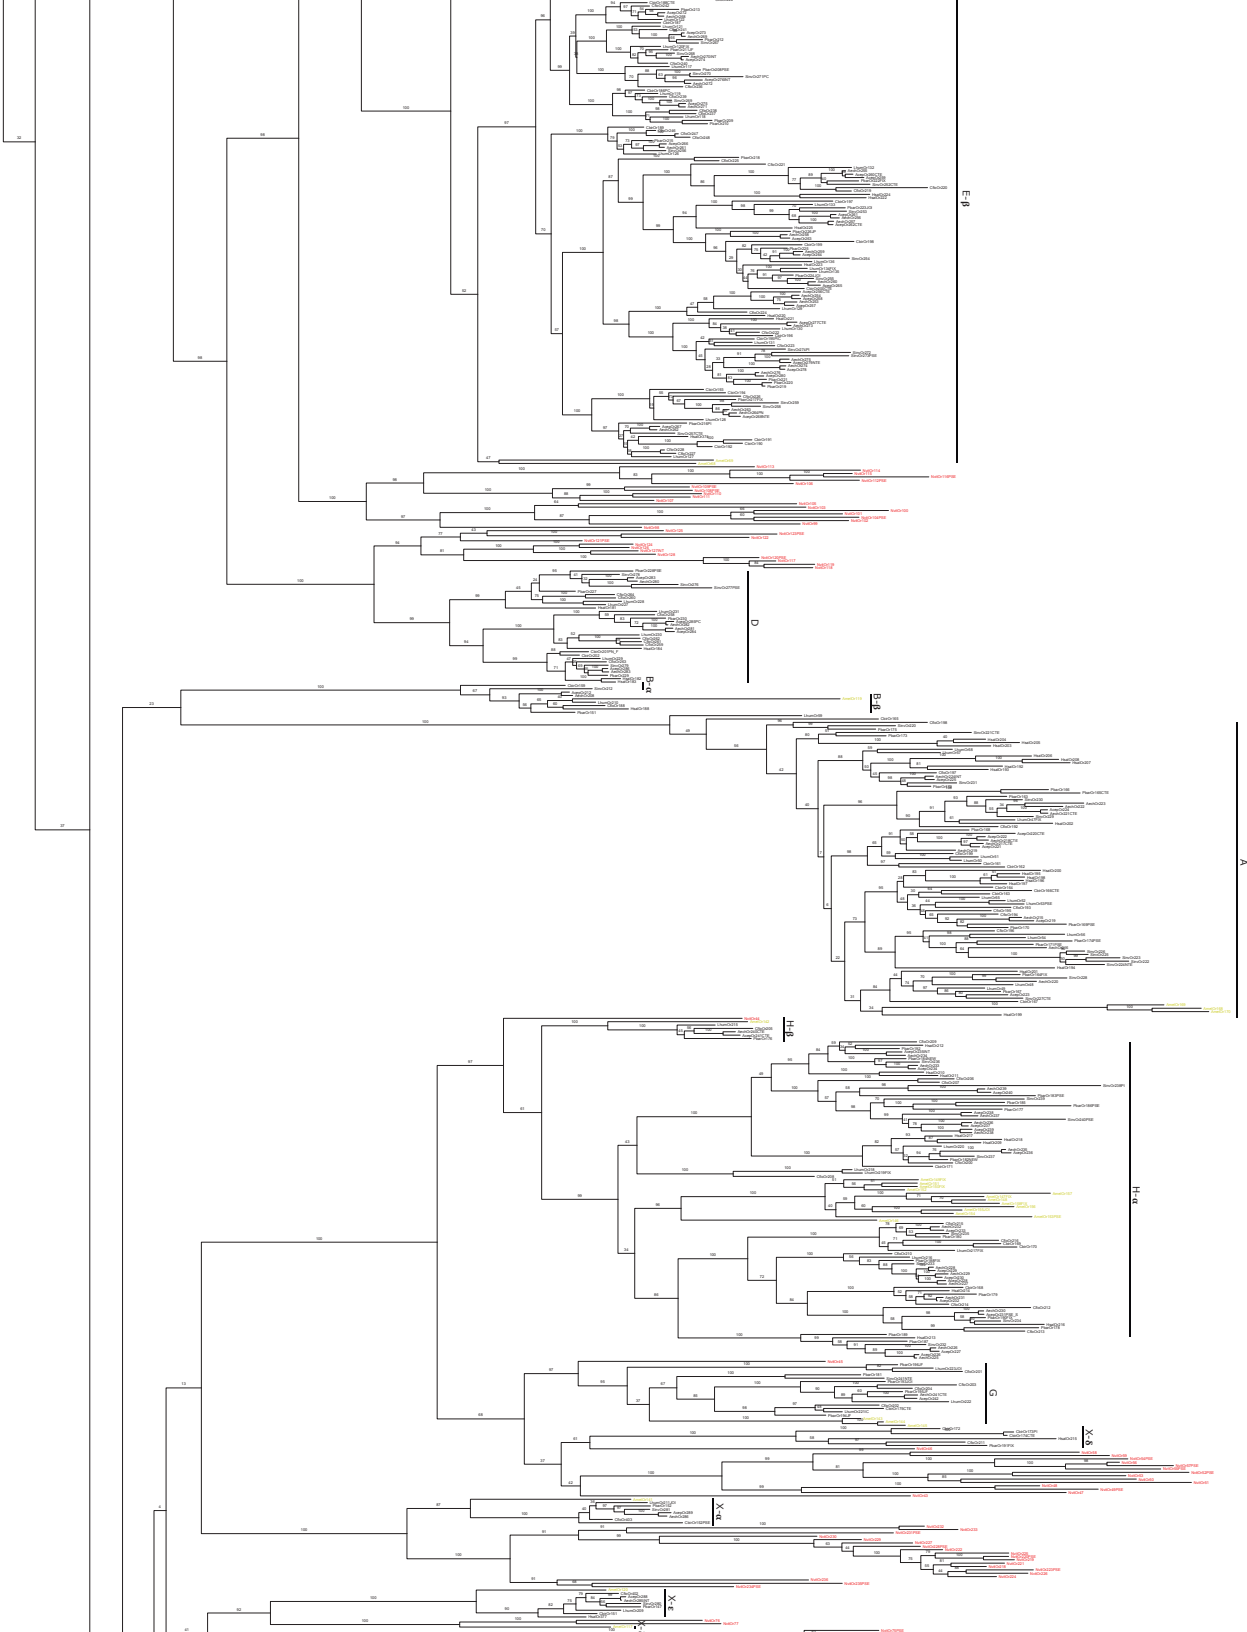

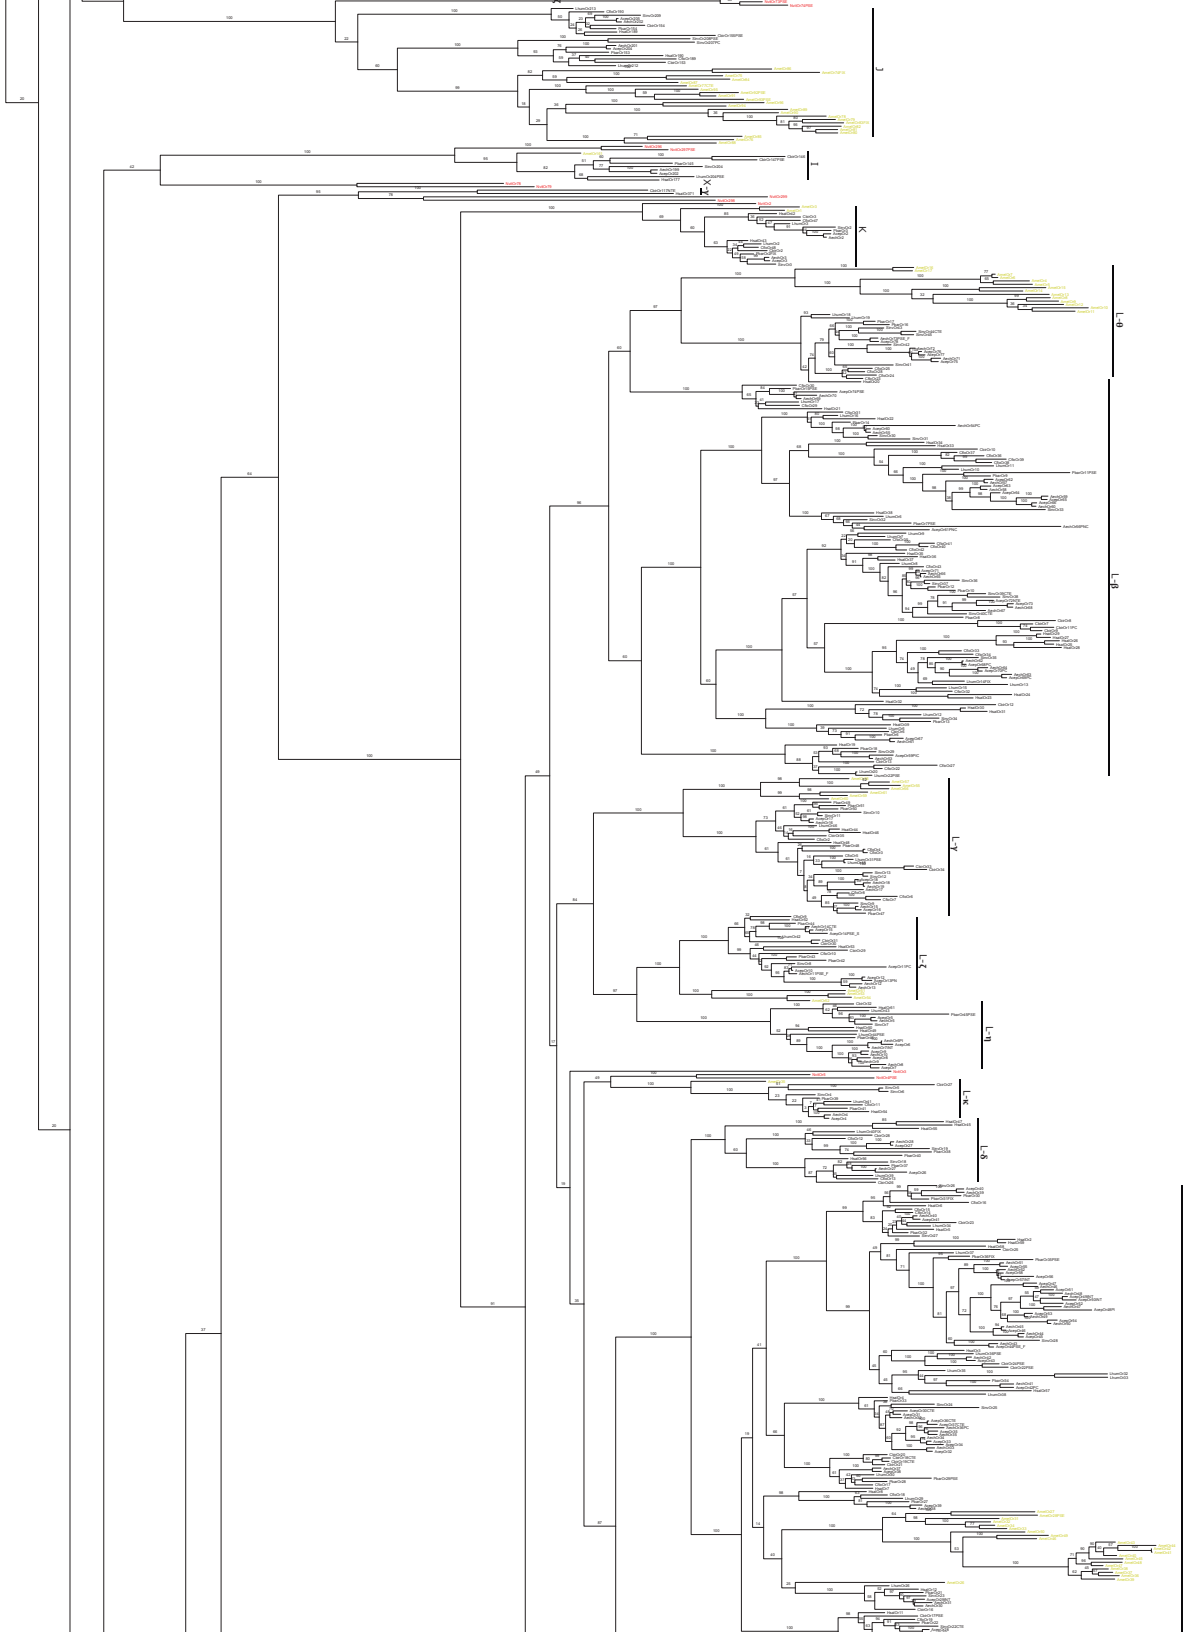

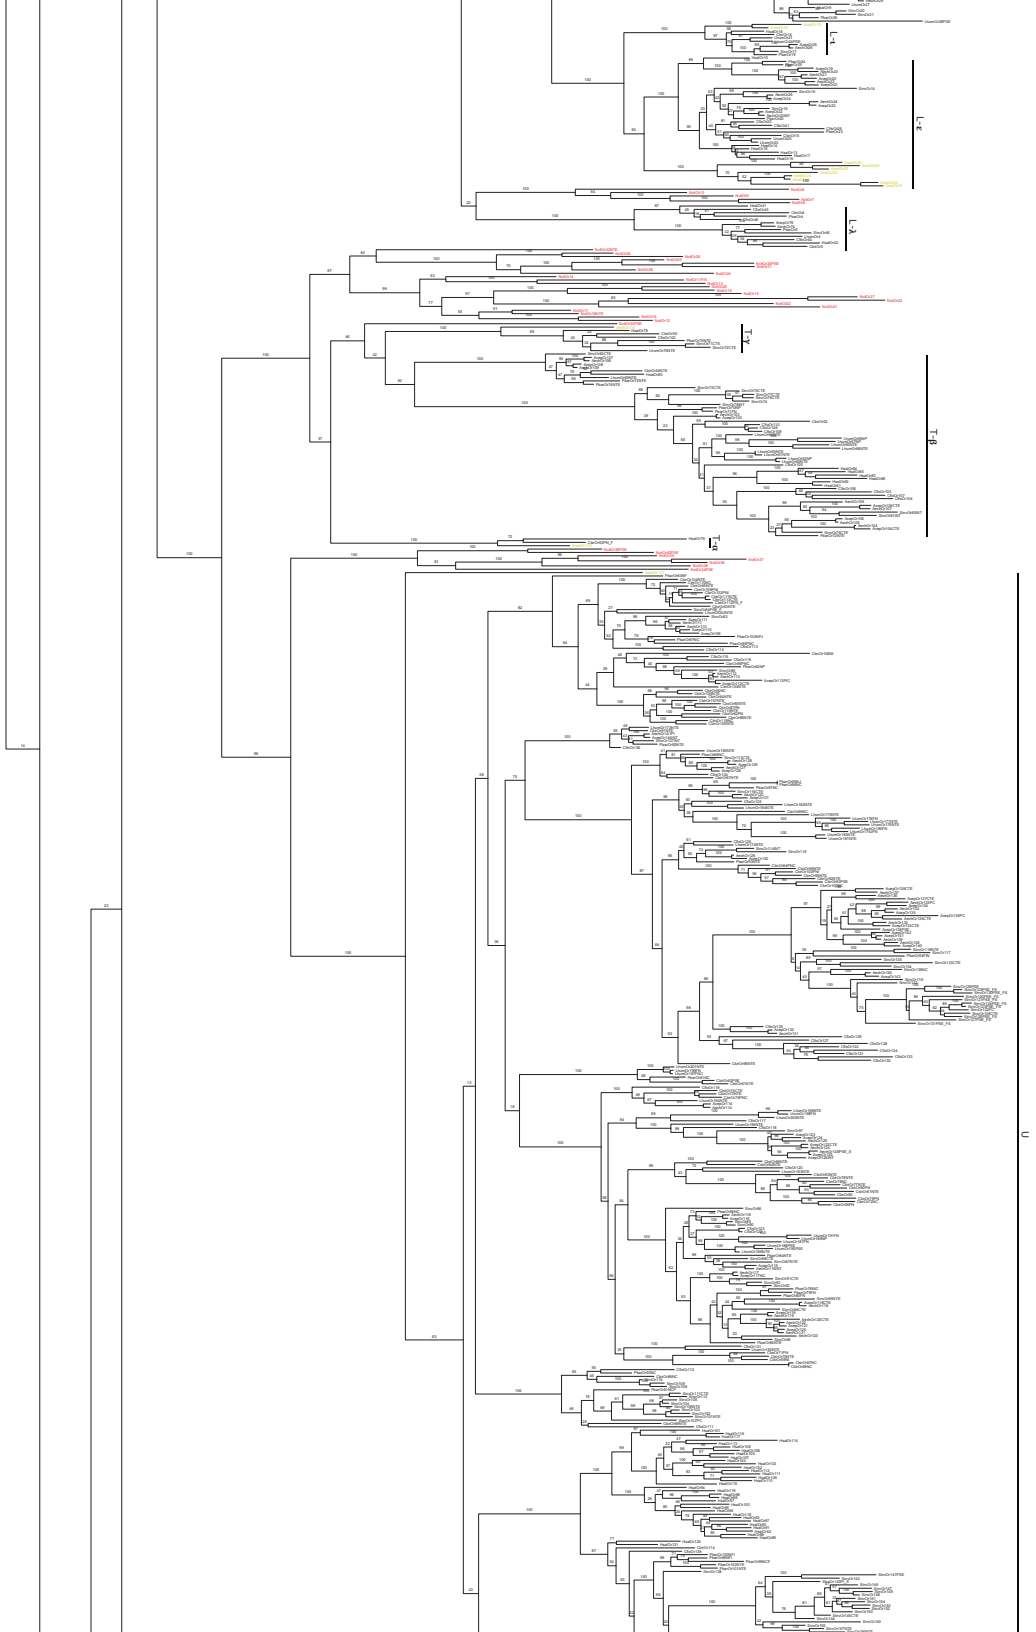

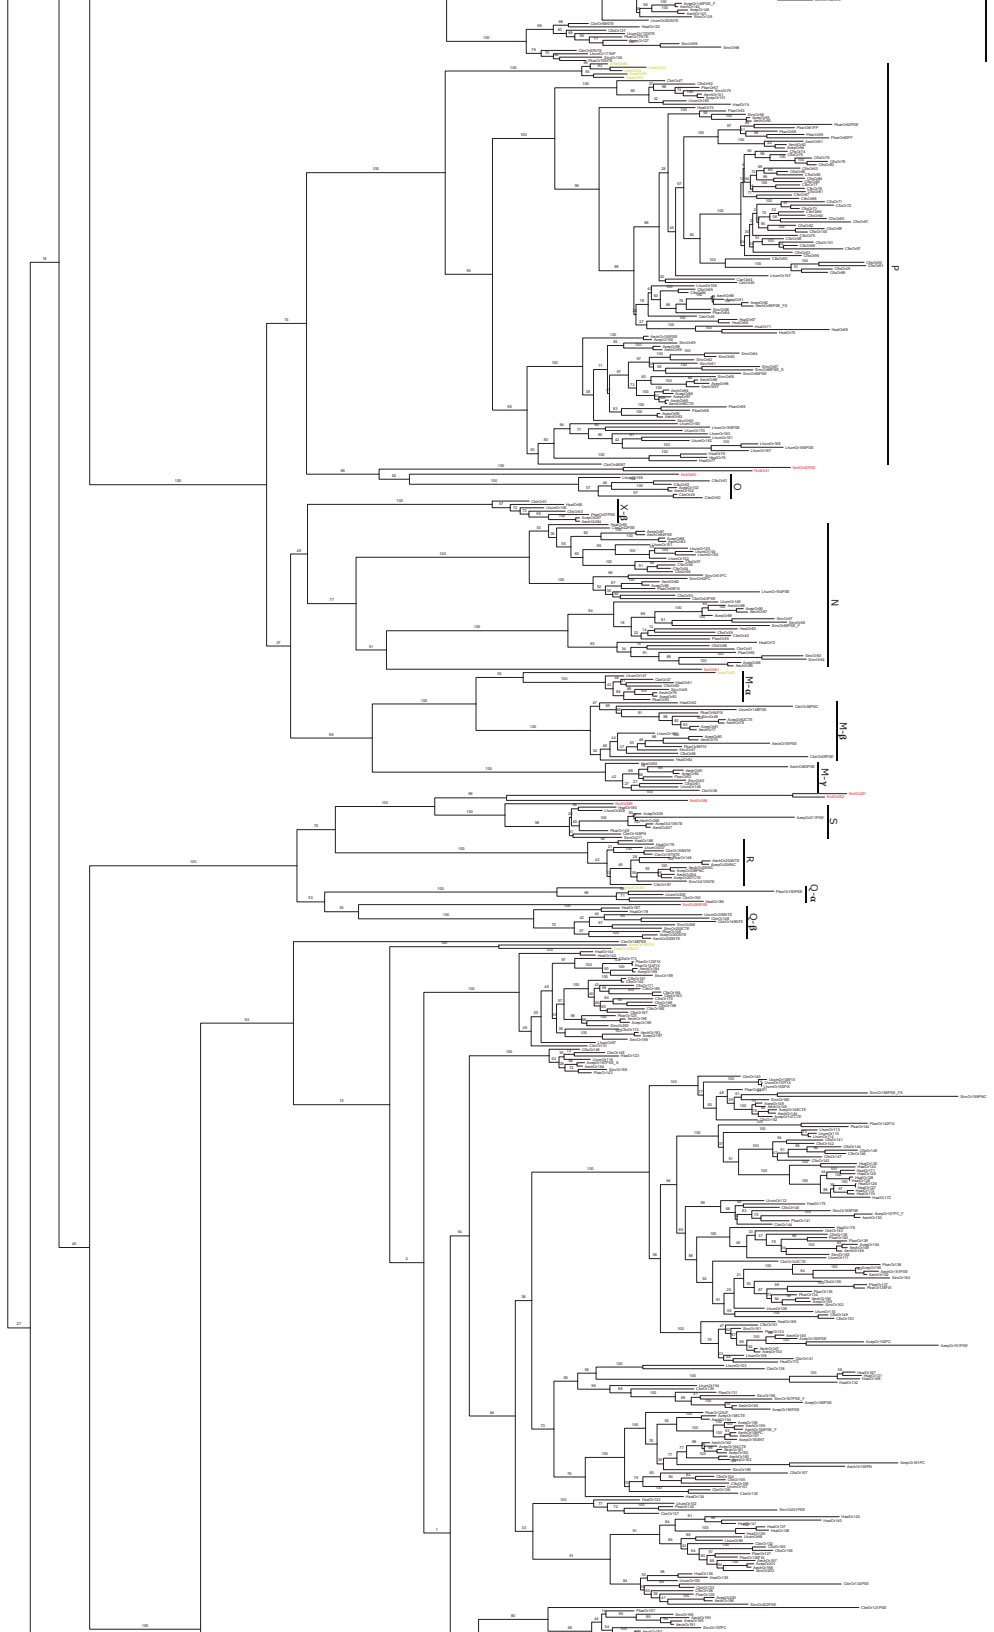

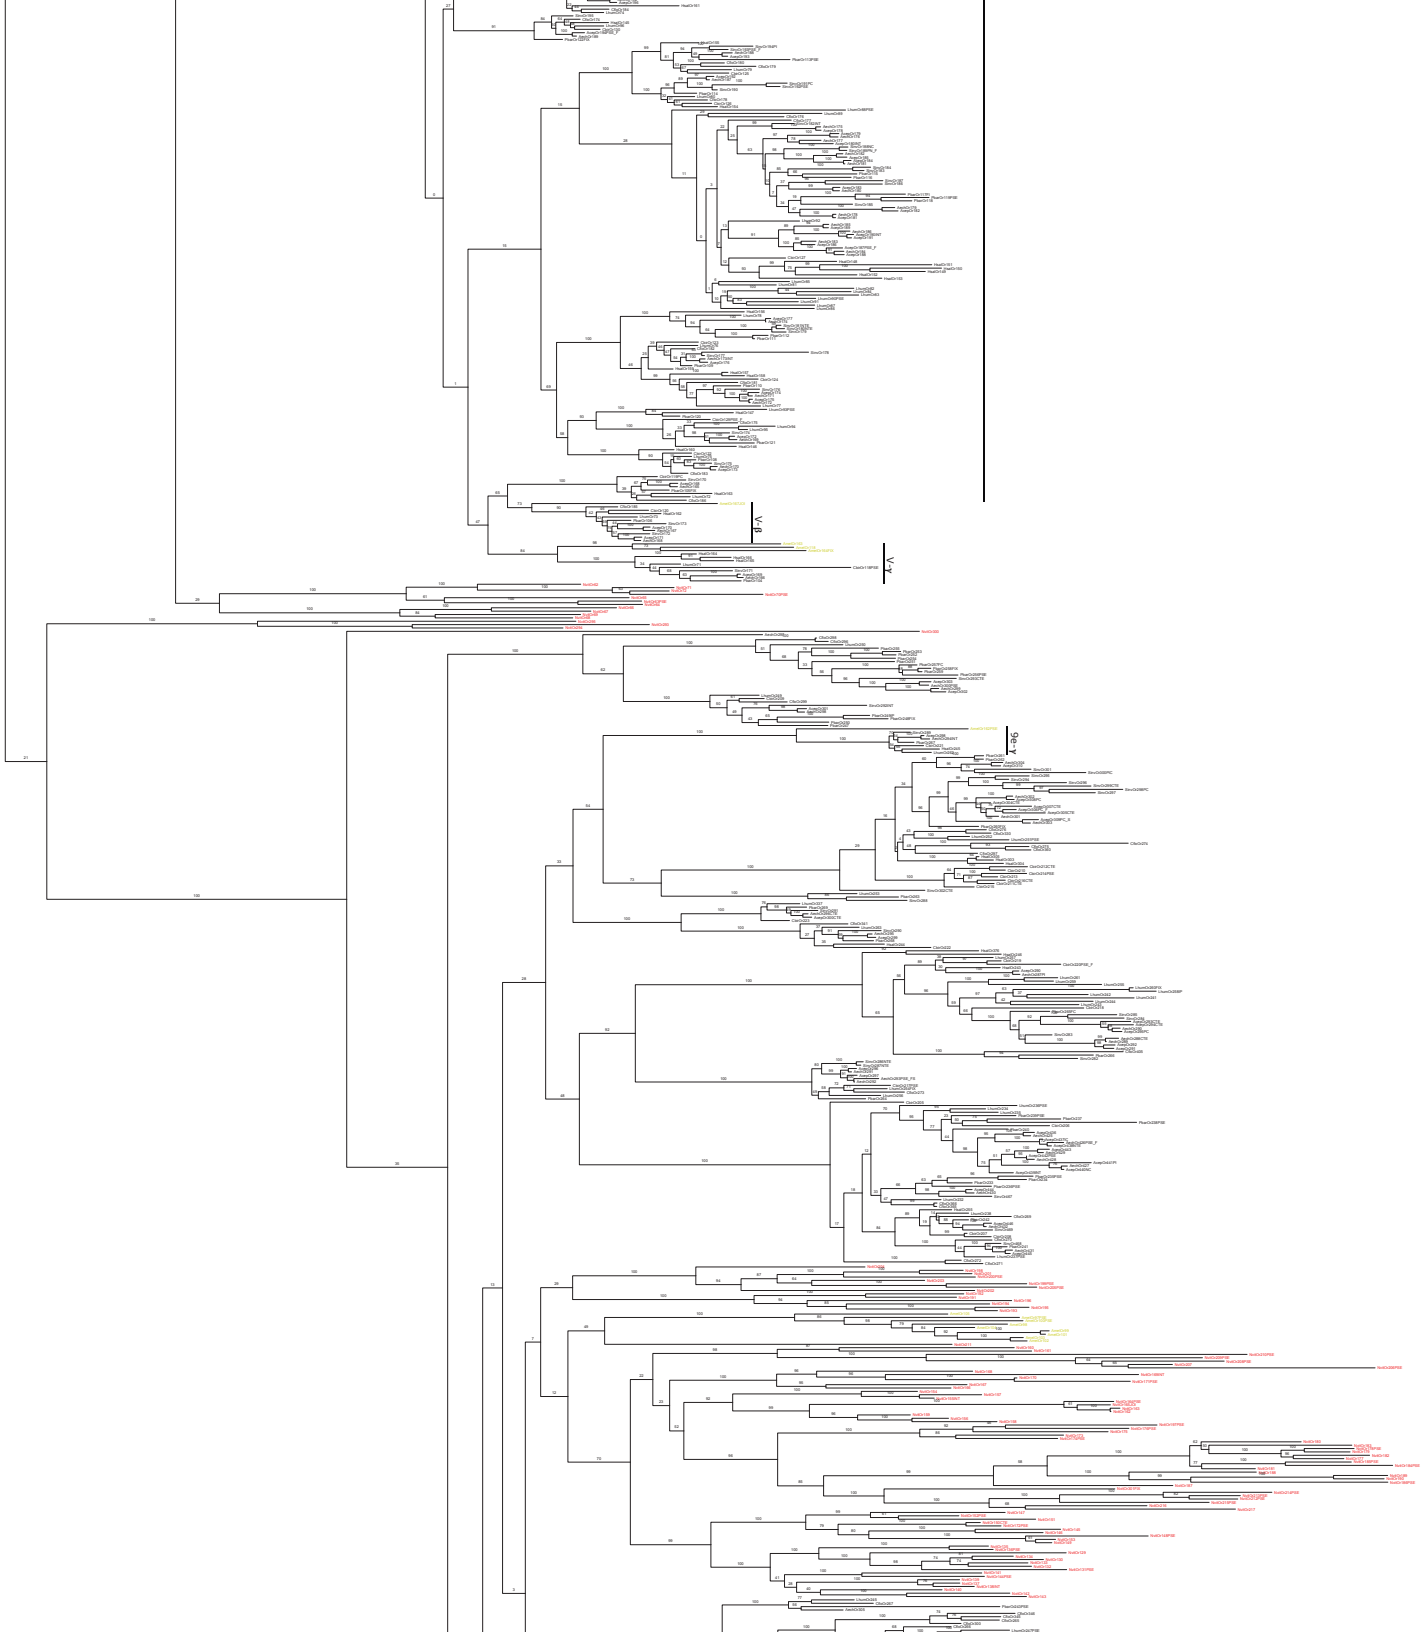

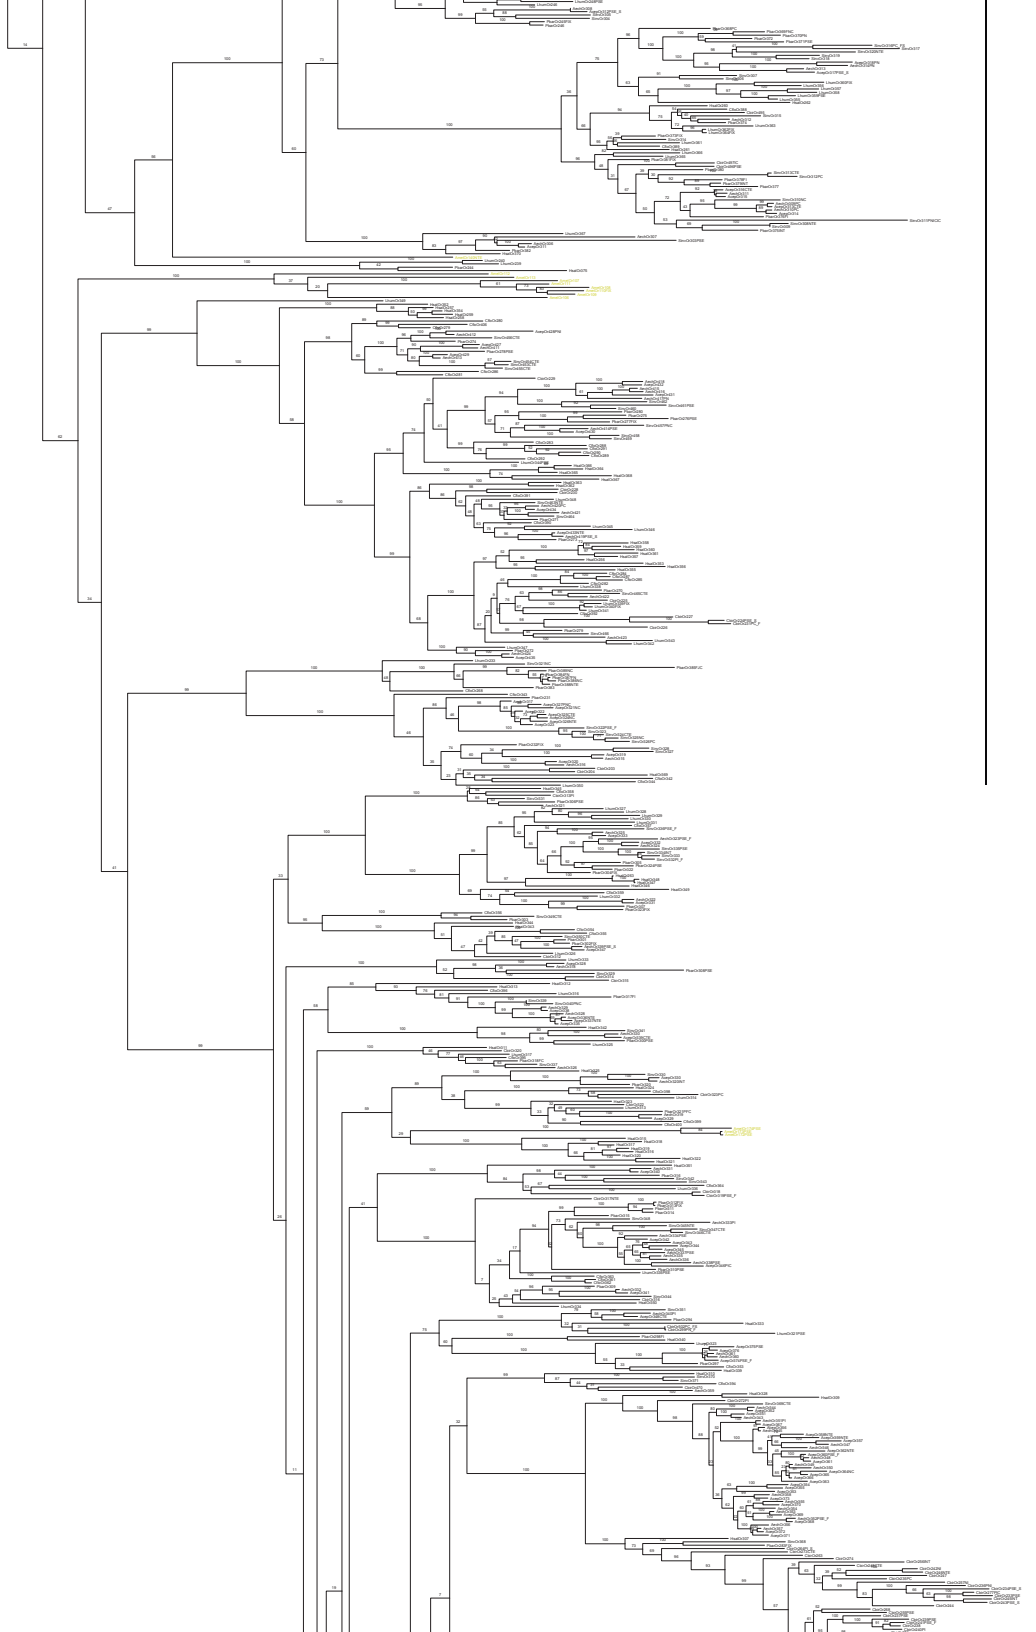



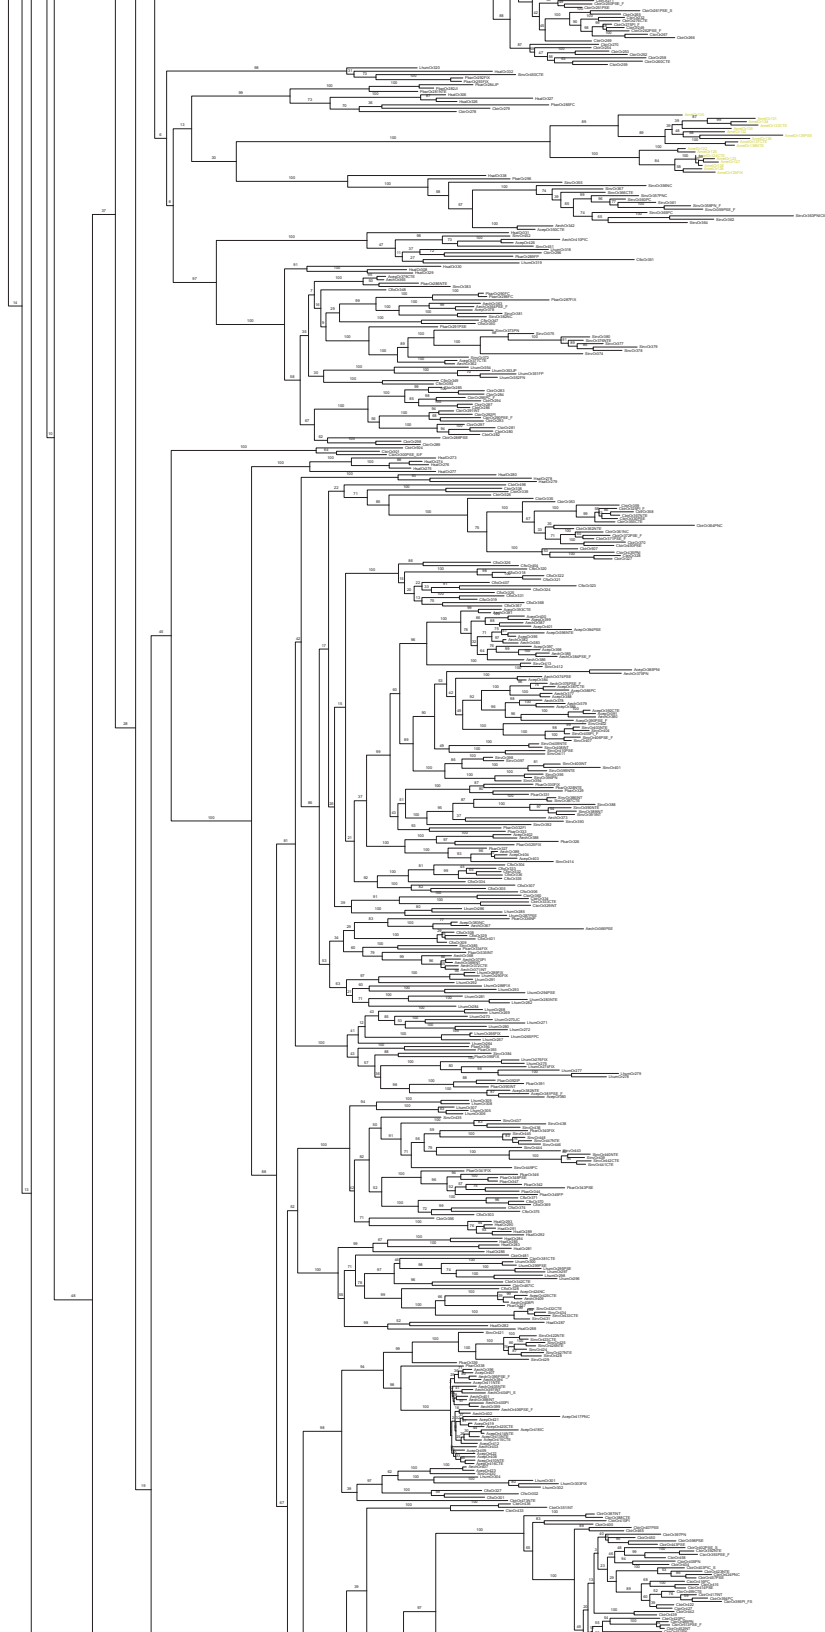

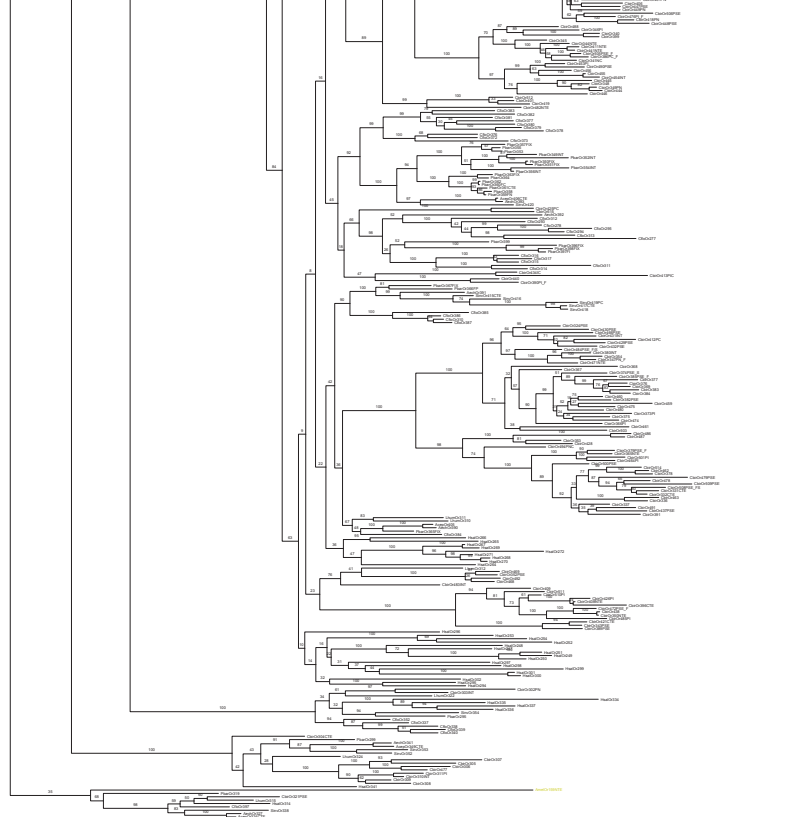

Supplement: pnas.1610800113.sd01.pdf [file pnas.1610800113.sd01.pdf]
